# Supplementary material for: A comprehensive assessment of water quality in Fayoum depression, Egypt: identifying contaminants, antibiotic pollution, and adsorption treatability study for remediation
Source: PubMed Central journal article supplement (PMC11324722; doi:10.1038/s41598-024-68990-8), 2024-08-14
Supplement: 41598_2024_68990_MOESM1_ESM.pdf [file 41598_2024_68990_MOESM1_ESM.pdf]

**Supplementary materials for**

**A Comprehensive Assessment of Water Quality in Fayoum Depression, Egypt:  
Identifying Contaminants, Antibiotic Pollution, and Adsorption Treatability Study  
for Remediation**

# **A Comprehensive Assessment of Water Quality in Fayoum Depression, Egypt: Identifying Contaminants, Antibiotic Pollution, and Adsorption Treatability Study for Remediation**

Mai Sayed Fouad <sup>1</sup>, Emad Fawzy Mustafa<sup>2</sup>, Mohamed Saad Hellal<sup>3\*</sup>, Mai Ali Mwaheb<sup>1\*</sup>

<sup>1</sup>Botany department, Faculty of Science, Fayoum University, Fayoum 63514, Egypt

<sup>2</sup>Water Management Research Institute, National Water Research Center NWRC, Egypt

<sup>3</sup>Water Pollution Research Department, National Research Centre, Cairo 12622, Egypt.

\*Correspondence: Mohamed Saad Hellal, [mohammed\\_saadh@yahoo.com](mailto:mohammed_saadh@yahoo.com). Water Pollution Research Department, National Research Centre, Cairo 12622, Egypt.

\*Correspondence: Mai Ali Mwaheb [mam08@fayoum.edu.eg](mailto:mam08@fayoum.edu.eg), Botany department, Faculty of Science, Fayoum University, Fayoum 63514, Egypt.

## **Method of Phyto-magnetite nanocomposite preparation**

*Phragmites australis* plant specimens were collected from Fayoum depression canals, located in Egypt. Specimens were separated into rhizomes before being washed thrice with deionized water to eliminate contaminants and debris, then left to air dry. Plant materials (rhizomes) were subsequently cut into small fragments, oven-dried at 60°C until thoroughly desiccated, then ground into fine powders. Aqueous extracts of rhizomes were prepared by adding ten grams of each organ to 200 mL of distilled water, heating, and stirring at 500 rpm with a magnetic stirrer (Thermo-fisher, USA) until boiling for approximately 20 minutes. Hot solutions were filtered through Whatman filter paper (Fig. 1S). Phyto-magnetite nanoparticles was prepared according to Jin et al<sup>1</sup> by dissolving 10.8g sample of FeCl<sub>3</sub>·6H<sub>2</sub>O and 4 g of FeCl<sub>2</sub>·4H<sub>2</sub>O were in 60 mL mixture solution containing 90% deionized water and 10% *Phragmites australis* extract to prepare a stock solution then 1.7 mL of HCl was added to the solution. The stock solution was then added drop by drop to 500 mL of 1.5 mol/L NaOH under vigorous stirring using a non-magnetic stirrer at 80°C. The Phyto-magnetite nanoparticles were precipitated and then washed several times with deionized water and ethanol. The Fe<sub>3</sub>O<sub>4</sub> nanoparticles were then

resuspended in deionized water. The as-prepared Fe<sub>3</sub>O<sub>4</sub> nanoparticles were stored under bench-top conditions until.

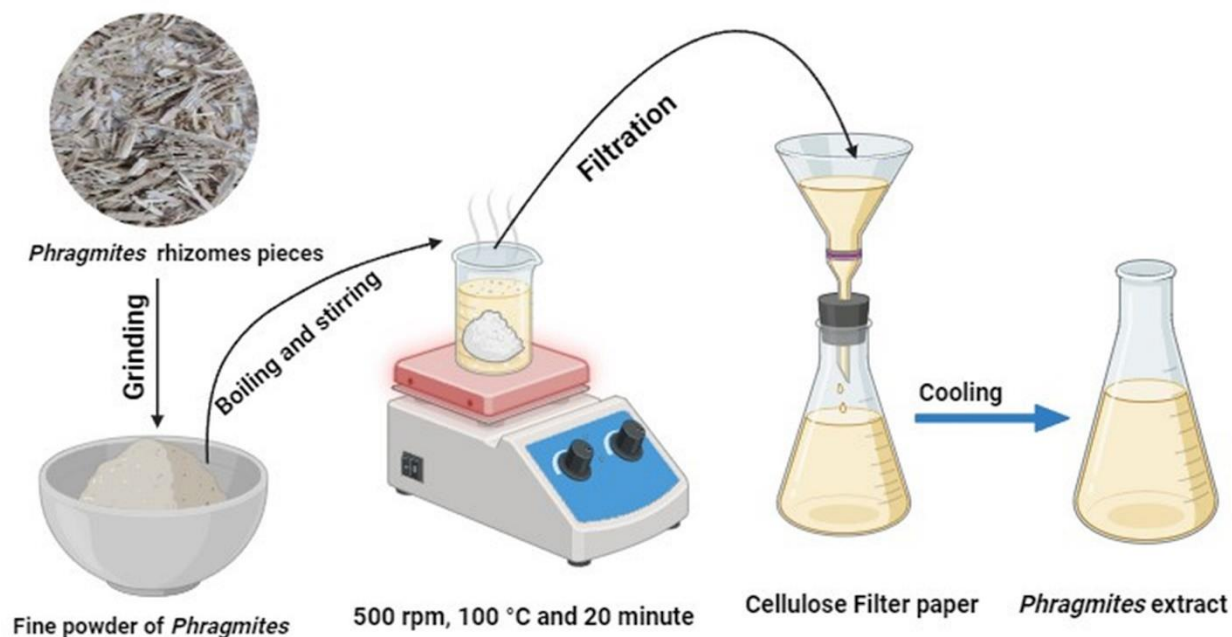

**Fig. 1S** Schematlic illustration of extraction

### **Characterization of Phyto-magnetite nanoparticle**

The physico-chemical characterization of Phyto-magnetite was carried out in terms of Transmission electron microscopy (TEM), surface area, X-ray diffraction (XRD) and FTIR spectrometry. TEM micrographs were performed on JEOL JEM-2100 high resolution transmission electron microscope at an accelerating voltage of 200 kV, respectively. Samples for TEM were prepared by placing a droplet of colloid suspension in respective solvent on a Formvar carbon-coated, 300-mesh copper grid (Ted Pella) and allowing them to evaporate in air at ambient conditions. Fig. 2S shows TEM micrographes of the phyto-magnetite nano-composite masses resemble structures in that they include

spherical, uniform, and virtually regular pores and voids with diameters ranging from 3.5 to 4.9 nm. Selected area electron diffraction (SAED) showed a concentric circle with spots of diffraction scattered around the edges of a particular region.

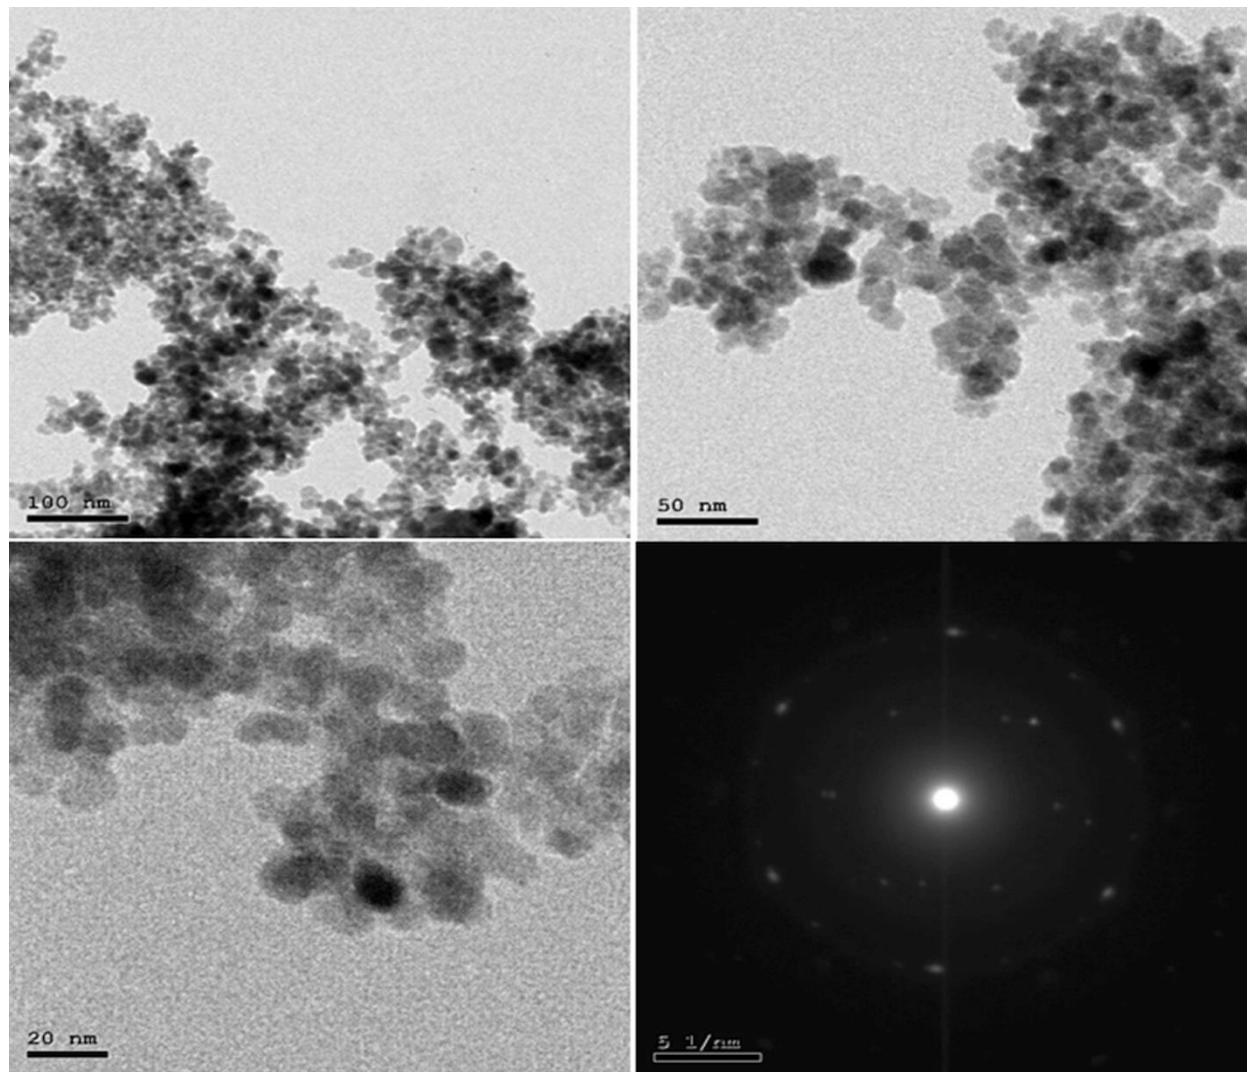

**Fig. 2S** TEM images of magnetite at different magnifications and SAED pattern

XRD pattern has been performed using XPERT-PRO Powder Diffractometer system, with 2 theta ( $10^\circ - 80^\circ$ ), with Minimum step size 2Theta: 0.001, and at wavelength ( $K\alpha$ ) =  $1.54614^\circ$ . The crystalline structures of the as-prepared material  $Fe_3O_4$  Nanomaterial were performed by XRD (Fig. 3S-a).  $Fe_3O_4$  structure displays nine characteristic peaks at  $2\theta = 18.4^\circ, 30.28^\circ, 35.67^\circ, 37.32^\circ, 43.36^\circ, 47.48^\circ, 53.80^\circ, 57.36^\circ$  and  $63.00^\circ$  and  $74.55^\circ$

which corresponds to the (111), (220), (311), (222), (400), (331) (422), (511) and (440) and (533) planes of cubic  $\text{Fe}_3\text{O}_4$  Reference code: 01-075-0449, respectively. FTIR spectroscopy was carried out using FT-IR vertex 70 RAM II, Bruker Spectrometer. FTIR spectra of is shown in (Fig. 3S-b) that shows the characteristic peak of iron oxides, i.e., Fe-O at  $543\text{ cm}^{-1}$ . The literature reports this peak at  $548\text{ cm}^{-1}$  <sup>2,3</sup>. Also, the spectrum exhibits modes typical for organic groups in regions of  $860\text{--}1650\text{ cm}^{-1}$ .

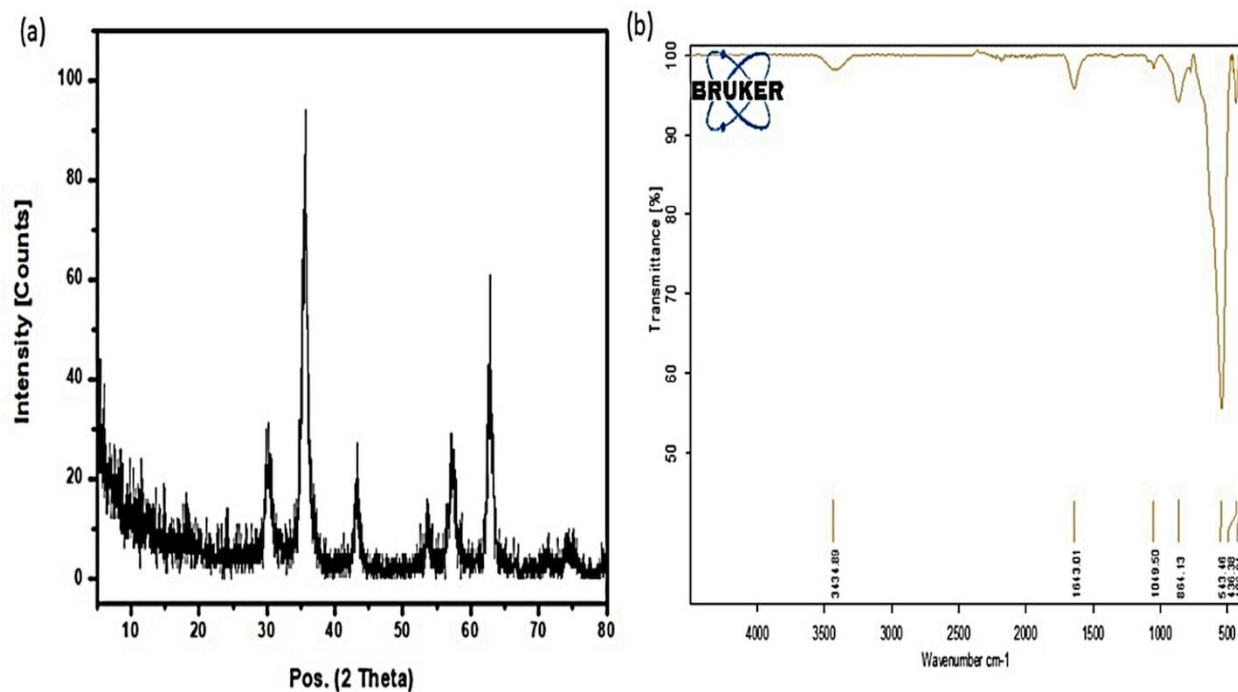

**Fig. 3S** (a), XRD pattern and (b), FTIR of the prepared nanoparticles

A surface area characteristic was carried out using Quantachrome (USA; Nova 2000 series) for  $\text{N}_2$  physisorption isotherm studies. Due to the presence of interparticle holes between the NPs, adsorption and desorption analysis of the fabricated Si NPs revealed a superior Brunauer–Emmett Teller (BET) surface area ( $186.5\text{ m}^2/\text{g}$ ), Barrett-Joyner-Halenda (BJH) surface area ( $129.7\text{ m}^2/\text{g}$ ), a total pore volume ( $0.54\text{ cm}^3/\text{g}$ ), and an average particle radius ( $1.92\text{ nm}$ ).

### Adsorption Study calculations

The adsorbed amount of antibiotic ( $q_e$ ) onto the developed nanocomposite adsorbent was calculated as shown in equation (1).

$$q_e \text{ (mg /g)} = \frac{(C_i - C_f)V}{m} \quad (1)$$

Where  $q_e$  (mg/g) is the number of pollutants adsorbed per unit weight of the adsorbent at equilibrium.  $C_i$  and  $C_f$  are the initial and final nickel ion concentration. While  $V$  is the volume of the aqueous solution and  $m$  (g) represent the weight of the nano adsorbent.

### **Kinetic modelling and adsorption isotherms**

Pseudo first order (PFO), and pseudo second order (PSO), models were used to analyze the adsorption processes. The linear form of the PFO, and PSO models were as follows (Eq. 2-4),

Pseudo first order:  $\ln(q_e - q_t) = \ln q_e - k_{PFO}t$  (2)

Pseudo Second order:  $\frac{t}{q_t} = \frac{1}{k_{PSO} \times q_e^2} + \frac{1}{q_e}$  (3)

Where  $q_t$  and  $q_e$  are connected to the quantity of TC and CIP adsorbed on per unit weight of Phyto-magnetite at time 't' and equilibrium, respectively. The constants  $K_{PFO}$  and  $K_{PSO}$  are in PFO, and PSO respectively.  $K_{PFO}$  and  $K_{PSO}$  are estimated through the slope and intercept of the curves of plot of  $\ln(q_e - q_t)$  versus 't',  $t/q_t$  versus 't'. The capacity of Phyto-magnetite on TC and CIP sequestration was examined using isotherm models i.e. Freundlich and Langmuir; the linear forms of the models are explained as follows (eq. 4-5).

Freundlich isotherm:  $\log q_e = \log K_F + \frac{1}{n} \log C_e$  (4)

Where,  $C_e$  and  $q_e$  are the equilibrium concentration (mg/L) and equilibrium adsorption capacity (mg/g) of antibiotics, respectively. From the slope and intercept of  $\log (q_e)$  versus  $\log (C_e)$ , the Freundlich parameter values,  $1/n$  and  $K_F$ , were calculated.

Langmuir isotherm: 
$$\frac{C_e}{q_e} = \frac{1}{q_m \times K_L} + \frac{C_e}{q_m} \quad (5)$$

Where  $q_m$ =maximum adsorption capacity of nanocomposite;  $K_L$ = Langmuir equilibrium constant (L /mg). The Langmuir isotherm assumes that the adsorption of TC and CIP on the surface of Phyto-magnetite in the monolayer. The values of  $q_m$  and  $K_L$  were estimated through the slope and intercept of plots of  $1/q_e$  versus  $1/C_e$ .

**Table 1S** Regulations limits of chemical and biological parameters in irrigation canals and drains.

| No. | Parameters      | Unit       | Irrigation Canal | Drainage canal |
|-----|-----------------|------------|------------------|----------------|
| 1   | pH              | ---        | 6.5-8.5          | 6-9            |
| 2   | DO              | mg/l       | 6                | --             |
| 3   | TDS             | mg/l       | 500              | 1000           |
| 4   | NH <sub>4</sub> | mg/l       | 0.5              | --             |
| 5   | NO <sub>3</sub> | mg/l       | 2                | --             |
| 6   | BOD             | mg/l       | 6                | 30             |
| 7   | COD             | mg/l       | 10               | 50             |
| 8   | Cd              | mg/l       | 0.001            | 0.03           |
| 9   | Cu              | mg/l       | 0.01             | 1              |
| 10  | Fe              | mg/l       | 0.5              | 3              |
| 11  | Mn              | mg/l       | 0.2              | 2              |
| 12  | Zn              | mg/l       | 0.01             | 2              |
| 13  | Pb              | mg/l       | 0.01             | 0.1            |
| 14  | Ni              | mg/l       | 0.02             | 0.1            |
| 15  | Total Coliform  | MPN/100 mL | --               | 1000           |

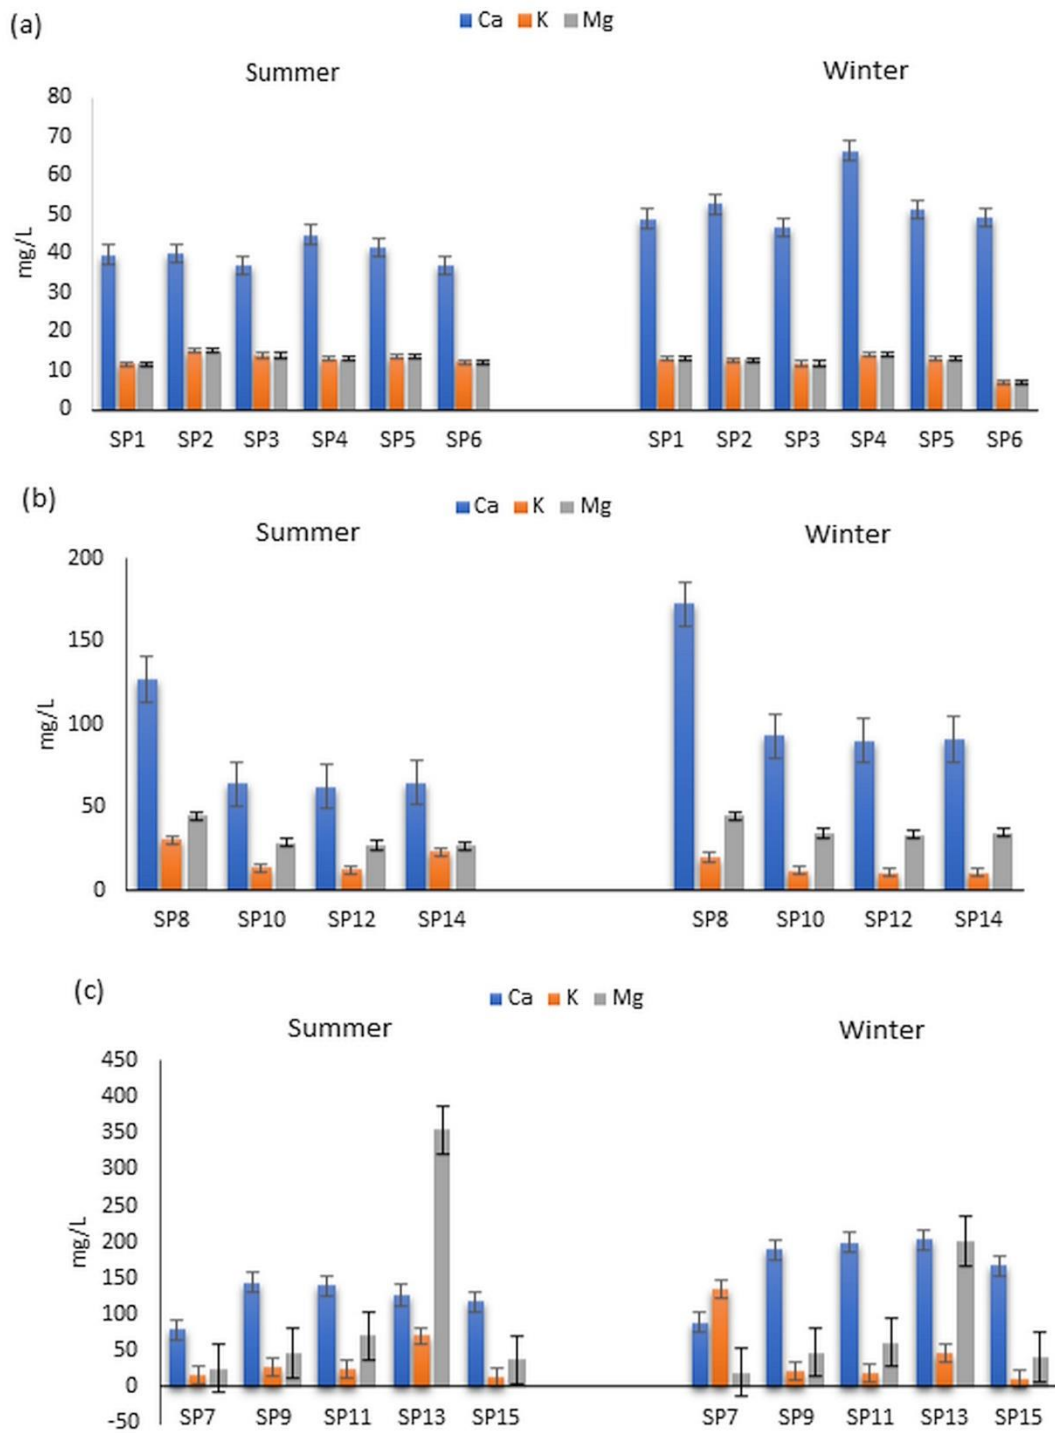

**Fig. 4S** Ca, Mg and K average concentration in different sampling sites (Group A, B, C) during summer and winter.



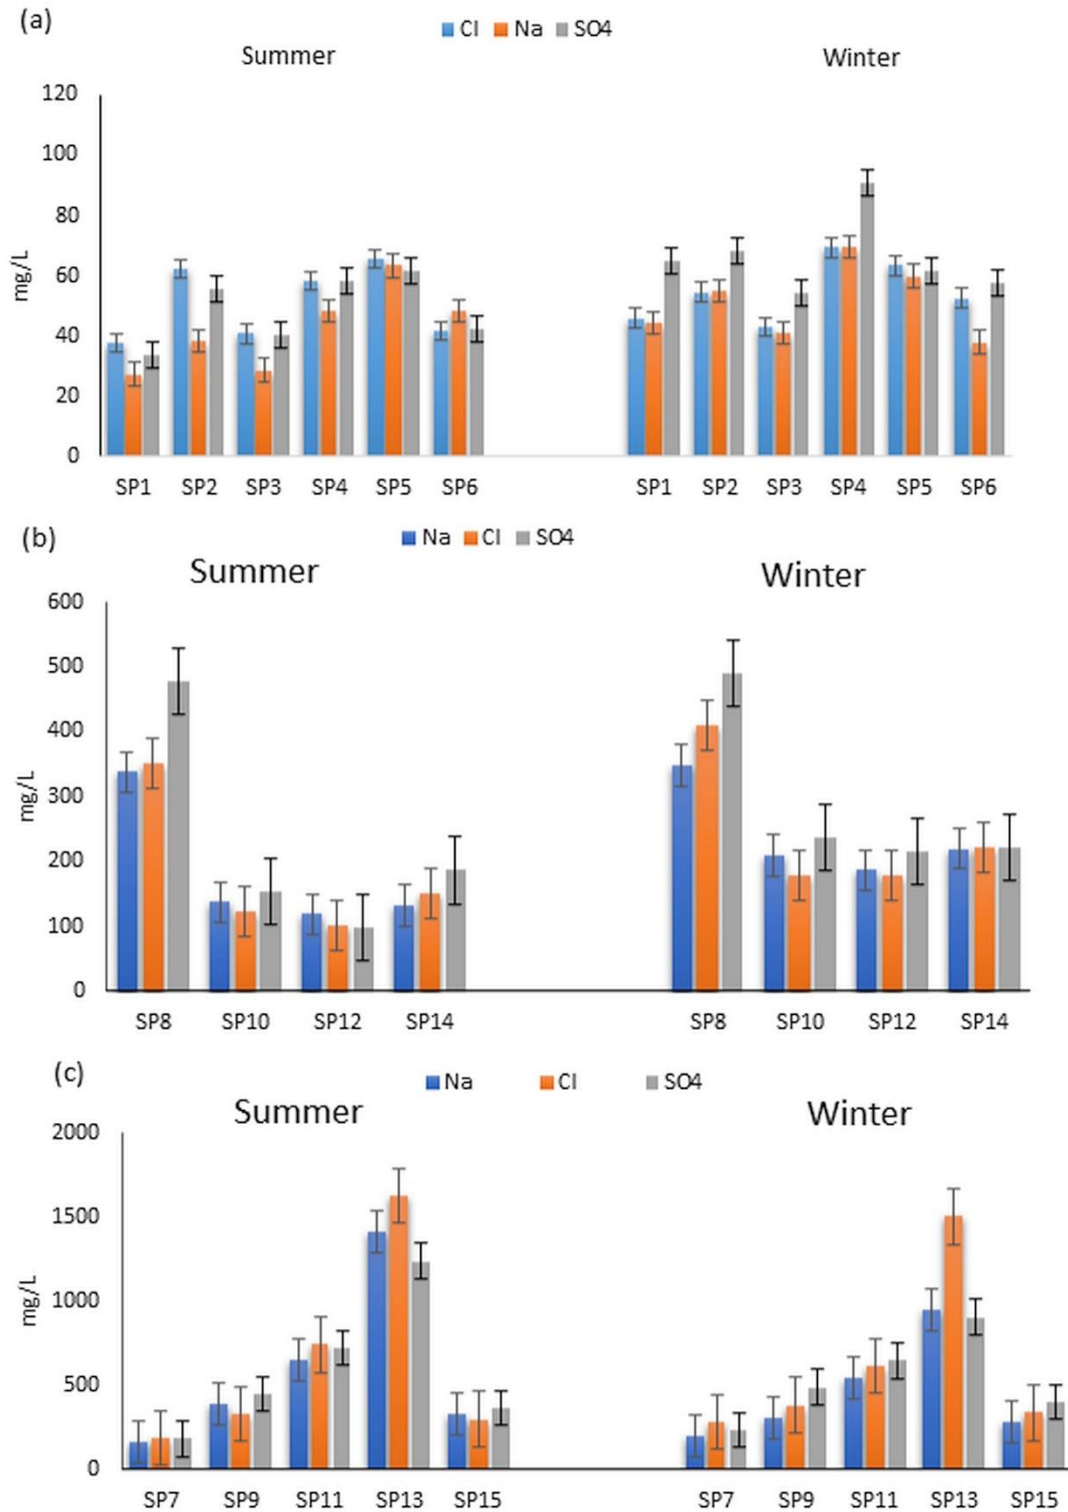

**Fig. 5S** Na, Cl and SO<sub>4</sub> average concentration in different waster sampling sites (Group A, B, C) during summer and winter.

**Table 2S** Results of physiochemical and metals parameters of the water sample sites in Group A (SP1-SP6) during summer and winter.

| Parameters       | Unit  | Summer |        |        |        | Winter |        |        |        |
|------------------|-------|--------|--------|--------|--------|--------|--------|--------|--------|
|                  |       | Min    | Max    | Mean   | SD     | Min    | Max    | Mean   | SD     |
| pH               | --    | 7.20   | 9.75   | 7.81   | 0.47   | 7.40   | 7.99   | 7.73   | 0.19   |
| Total Alkalinity | mg/L  | 135    | 243    | 188.59 | 27.25  | 133    | 240    | 190.21 | 21.72  |
| EC               | μS/cm | 431.67 | 786.67 | 578.27 | 91.55  | 363.33 | 791.67 | 615.96 | 115.58 |
| TDS              | mg/L  | 259    | 472    | 346.96 | 54.93  | 218    | 475    | 369.57 | 69.35  |
| NH <sub>3</sub>  | mg/L  | 0.10   | 16.    | 1.39   | 2.96   | 0.01   | 22     | 4.06   | 7.16   |
| BOD              | mg/L  | 2.0    | 10.1   | 9.62   | 4.7    | 2      | 14     | 8.57   | 2.14   |
| COD              | mg/L  | 4.0    | 17.4   | 11.01  | 6.8    | 6      | 19.3   | 4.27   | 13.62  |
| Ca               | mg/L  | 30.58  | 62.39  | 41.06  | 8.63   | 44     | 69     | 52.57  | 6.89   |
| K                | mg/L  | 5      | 15     | 7.64   | 2.12   | 5      | 9      | 6.57   | 1.19   |
| Mg               | mg/L  | 9.10   | 18.40  | 13.36  | 2.18   | 6.85   | 18.40  | 12.08  | 3.10   |
| Na               | mg/L  | 30     | 75     | 51.55  | 12.87  | 40     | 70     | 54.99  | 10.29  |
| Cl               | mg/L  | 18.90  | 68.70  | 43.13  | 15.09  | 35.90  | 70.40  | 51.27  | 11.58  |
| NO <sub>3</sub>  | mg/L  | 0.25   | 3      | 1.64   | 0.99   | 0.20   | 0.90   | 0.51   | 0.18   |
| PO <sub>4</sub>  | mg/L  | 0.27   | 0.51   | 0.41   | 0.045  | 0.23   | 0.67   | 0.37   | 0.11   |
| SO <sub>4</sub>  | mg/L  | 28     | 92.50  | 49.8   | 14.47  | 50.80  | 92.50  | 66.32  | 12.36  |
| Al               | mg/L  | 0.01   | 0.13   | 0.07   | 0.04   | <0.001 | 0.35   | 0.07   | 0.08   |
| Ba               | mg/L  | 0.02   | 0.09   | 0.06   | 0.02   | 0.02   | 0.04   | 0.03   | 0.01   |
| Cu               | mg/L  | 0.009  | 0.04   | 0.013  | 0.001  | 0.012  | 0.07   | 0.035  | 0.013  |
| Fe               | mg/L  | 0.039  | 0.30   | 0.14   | 0.05   | 0.041  | 0.22   | 0.087  | 0.05   |
| Mn               | mg/L  | <0.001 | <0.001 | <0.001 | <0.001 | <0.001 | <0.001 | <0.001 | <0.001 |
| Zn               | mg/L  | <0.001 | <0.001 | <0.001 | <0.001 | 0.01   | 0.04   | 0.03   | 0.01   |

**Table 3S** Results of physiochemical and metals parameters of the water sample sites in Group B (SP8, SP10, SP12 and SP14) during summer and winter.

| Parameters       | Unit  | Summer |        |        |        | Winter |        |        |        |
|------------------|-------|--------|--------|--------|--------|--------|--------|--------|--------|
|                  |       | Min    | Max    | Mean   | SD     | Min    | Max    | Mean   | SD     |
| pH               | --    | 7.22   | 7.98   | 7.69   | 0.22   | 7.40   | 8.01   | 7.74   | 0.17   |
| Total Alkalinity | mg/L  | 240    | 500    | 334.94 | 62.59  | 246    | 425    | 327.81 | 39.71  |
| EC               | µS/cm | 1058   | 3098.  | 2007   | 691    | 2005   | 4480   | 3109   | 763    |
| TDS              | mg/L  | 635    | 1859   | 1204   | 415    | 1203   | 2688   | 1865   | 458    |
| NH <sub>3</sub>  | mg/L  | 0.68   | 19     | 2.74   | 4.09   | 0.68   | 4      | 2.47   | 0.81   |
| BOD              | mg/L  | 3      | 20     | 13.94  | 4.84   | 2      | 19     | 14.19  | 4.70   |
| COD              | mg/L  | 12     | 54     | 29.50  | 12.43  | 16     | 40     | 30.72  | 7.33   |
| Ca               | mg/L  | 58     | 130.40 | 80.05  | 28.20  | 58     | 267.13 | 112.67 | 55.69  |
| K                | mg/L  | 10     | 62     | 20.81  | 12.85  | 7.05   | 30     | 13.53  | 6.05   |
| Mg               | mg/L  | 15     | 50.10  | 31.72  | 8.70   | 28.40  | 48.98  | 36.81  | 6.50   |
| Na               | mg/L  | 30.40  | 351    | 179.72 | 96.93  | 95     | 405    | 247.69 | 113.88 |
| Cl               | mg/L  | 94.80  | 360    | 182.20 | 100.47 | 94     | 593.10 | 252.04 | 143.69 |
| NO <sub>3</sub>  | mg/L  | 0.11   | 8      | 4.43   | 3.13   | 0.11   | 9.10   | 4.68   | 3.61   |
| PO <sub>4</sub>  | mg/L  | 0.48   | 1.5    | 0.9    | 0.05   | 0.21   | 2.35   | 0.68   | 0.61   |
| SO <sub>4</sub>  | mg/L  | 92.50  | 520    | 230.09 | 152.51 | 100.5  | 648.5  | 297.22 | 161.86 |
| Al               | mg/L  | 0.03   | 1.51   | 0.91   | 0.26   | 0.03   | 0.20   | 0.12   | 0.05   |
| Ba               | mg/L  | 0.03   | 0.08   | 0.06   | 0.01   | 0.03   | 0.07   | 0.05   | 0.01   |
| Cu               | mg/L  | <0.01  | 0.08   | 0.03   | 0.03   | 0.01   | 0.04   | 0.02   | 0.01   |
| Fe               | mg/L  | 0.06   | 0.30   | 0.14   | 0.08   | 0.06   | 0.42   | 0.22   | 0.13   |
| Mn               | mg/L  | <0.01  | <0.01  | <0.01  | <0.01  | <0.01  | <0.01  | <0.01  | <0.01  |
| Zn               | mg/L  | <0.01  | <0.01  | <0.01  | <0.01  | 0.01   | 0.04   | 0.03   | 0.01   |

**Table 4S** Results of physiochemical and metals parameters of the water sample sites in Group C (SP7, SP9, SP11, SP13 and SP15) during summer and winter

| Parameters       | Unit  | Summer |         |         |         | Winter  |        |         |         |
|------------------|-------|--------|---------|---------|---------|---------|--------|---------|---------|
|                  |       | Min    | Max     | Mean    | SD      | Min     | Max    | Mean    | SD      |
| pH               | --    | 7.55   | 7.97    | 7.74    | 0.12    | 7.26    | 7.96   | 7.72    | 0.19    |
| Total Alkalinity | mg/L  | 311    | 586     | 430.40  | 76.60   | 280.00  | 542    | 413.91  | 78.07   |
| EC               | µS/cm | 1375   | 9833.33 | 4662.48 | 2705.75 | 2016.67 | 9800   | 3700.31 | 2072.63 |
| TDS              | mg/L  | 825    | 5900    | 2797.49 | 1623.45 | 1210    | 5880   | 2220.19 | 1243.58 |
| NH <sub>3</sub>  | mg/L  | 1.40   | 7       | 3.71    | 1.55    | 13.90   | 31     | 17.71   | 4.43    |
| BOD              | mg/L  | 13     | 94      | 38.48   | 23.27   | 5       | 58     | 23.99   | 14.79   |
| COD              | mg/L  | 33     | 161     | 68.52   | 34.02   | 14.00   | 80     | 41.89   | 16.70   |
| Ca               | mg/L  | 70.18  | 186     | 122.82  | 26.40   | 85.33   | 277.88 | 171.24  | 63.46   |
| K                | mg/L  | 11     | 78      | 30.81   | 21.31   | 10      | 145    | 45.15   | 47.95   |
| Mg               | mg/L  | 20.10  | 366.4   | 110.43  | 127.81  | 19.10   | 345    | 72.65   | 85.35   |
| Na               | mg/L  | 148    | 1452    | 607.07  | 447.38  | 187     | 1400   | 452.42  | 327.43  |
| Cl               | mg/L  | 152    | 2280    | 641.02  | 657.76  | 268     | 2267   | 612.66  | 541.40  |
| NO <sub>3</sub>  | mg/L  | 0.11   | 9.10    | 2.77    | 3.12    | 0.15    | 9.10   | 2.32    | 2.30    |
| PO <sub>4</sub>  | mg/L  | 0.11   | 3.10    | 1.28    | 1.00    | 0.30    | 1.50   | 0.70    | 0.39    |
| SO <sub>4</sub>  | mg/L  | 155    | 1246.74 | 605.58  | 372.44  | 234.50  | 1237   | 537.34  | 260.84  |
| Al               | mg/L  | 0.02   | 0.27    | 0.13    | 0.09    | 0.02    | 0.24   | 0.11    | 0.10    |
| Ba               | mg/L  | 0.04   | 0.08    | 0.06    | 0.01    | 0.03    | 0.08   | 0.05    | 0.01    |
| Cu               | mg/L  | 0.01   | 0.06    | 0.02    | 0.01    | 0.01    | 0.05   | 0.03    | 0.01    |
| Fe               | mg/L  | 0.03   | 0.98    | 0.23    | 0.23    | 0.03    | 0.27   | 0.13    | 0.08    |
| Mn               | mg/L  | 0.01   | 0.04    | 0.02    | 0.001   | 0.01    | 0.06   | 0.03    | 0.02    |
| Zn               | mg/L  | 0.01   | 0.011   | 0.01    | 0.001   | 0.01    | 0.02   | 0.01    | 0.001   |

**Table 5S** Fungal counts in different samples collected from canals and drains during summer and winter.

| Samples group | Samples points | Summer (CFU/mL) |     |         | Winter (CFU/mL) |     |         |
|---------------|----------------|-----------------|-----|---------|-----------------|-----|---------|
|               |                | Min             | Max | Average | Min             | Max | Average |
| A             | SP1            | 10              | 15  | 12±2    | 5               | 8   | 6±2     |
|               | SP2            | 24              | 38  | 34±6    | 10              | 12  | 11±1    |
|               | SP3            | 12              | 32  | 18±8    | 8               | 12  | 10±2    |
|               | SP4            | 8               | 33  | 27±11   | 3               | 18  | 12±8    |
|               | SP5            | 24              | 31  | 28±3    | 12              | 19  | 16±4    |
|               | SP6            | 13              | 76  | 28±27   | 6               | 30  | 15±13   |
| C             | SP7            | 41              | 48  | 44±3    | 22              | 28  | 25±4    |
| B             | SP8            | 63              | 73  | 63±10   | 30              | 34  | 31±2    |
| C             | SP9            | 43              | 55  | 48±5    | 21              | 28  | 24±4    |
| B             | SP10           | 49              | 56  | 53±4    | 27              | 31  | 28±2    |
| C             | SP11           | 22              | 68  | 51±17   | 11              | 29  | 22±9    |
| B             | SP12           | 9               | 65  | 46±22   | 6               | 18  | 13±6    |
| C             | SP13           | 52              | 65  | 57±6    | 31              | 33  | 32±1    |
| B             | SP14           | 20              | 31  | 24±5    | 9               | 22  | 17±7    |
| C             | SP15           | 50              | 71  | 61±8    | 32              | 35  | 33±2    |

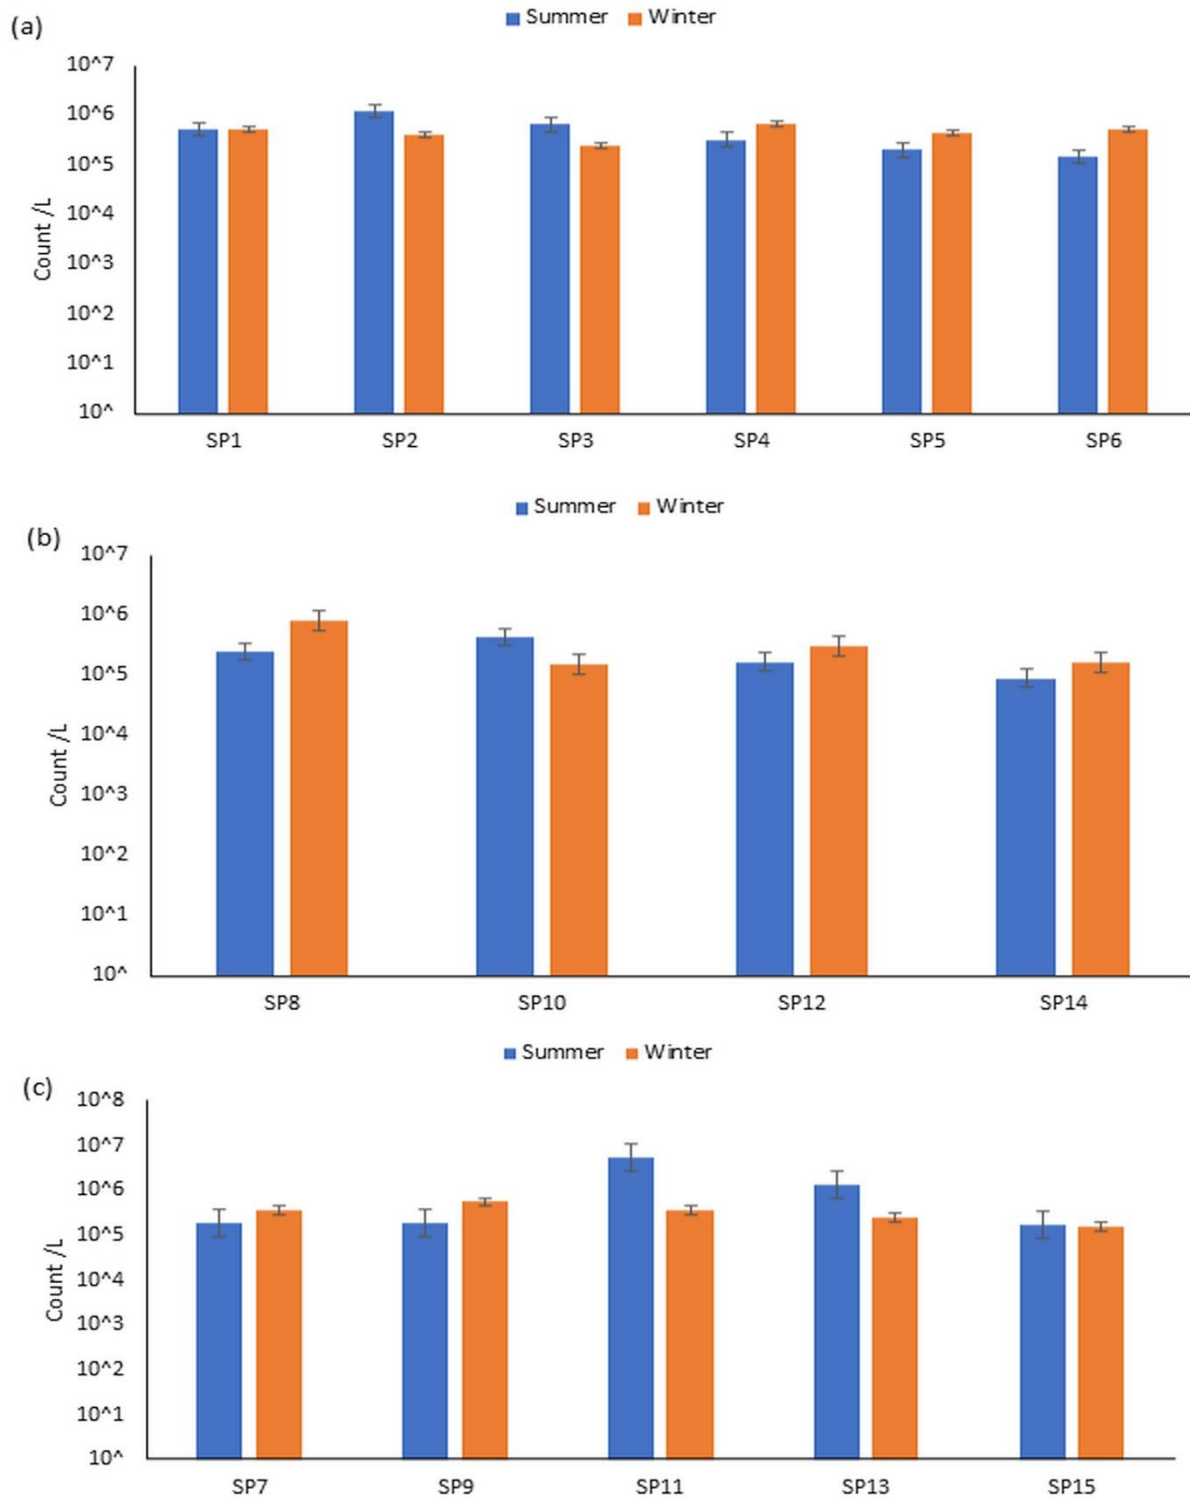

**Fig. 6S** Algae counts results for all collected samples during winter and summer.

## References

1. Jin, R. *et al.* Magnetic core/shell Fe<sub>3</sub>O<sub>4</sub>/Au nanoparticles for studies of quinolones binding to protein by fluorescence spectroscopy. *Luminescence* **31**, 499–506 (2016).
2. Lesiak, B. *et al.* Surface Study of Fe<sub>3</sub>O<sub>4</sub> Nanoparticles Functionalized With Biocompatible Adsorbed Molecules. *Front. Chem.* **7**, (2019).
3. Sangeetha, J., Thomas, S., Arutchelvi, J., Doble, M. & Philip, J. Functionalization of iron oxide nanoparticles with biosurfactants and biocompatibility studies. *J. Biomed. Nanotechnol.* **9**, 751–764 (2013).
